# Supplementary material for: Synergistic Antibiotic Activity of Ricini Semen Extract with Oxacillin against Methicillin-Resistant Staphylococcus aureus
Source: MDPI journal article supplement (doi:10.3390/antibiotics12020340), 2023-02-06
Supplement: s1 [file s1]

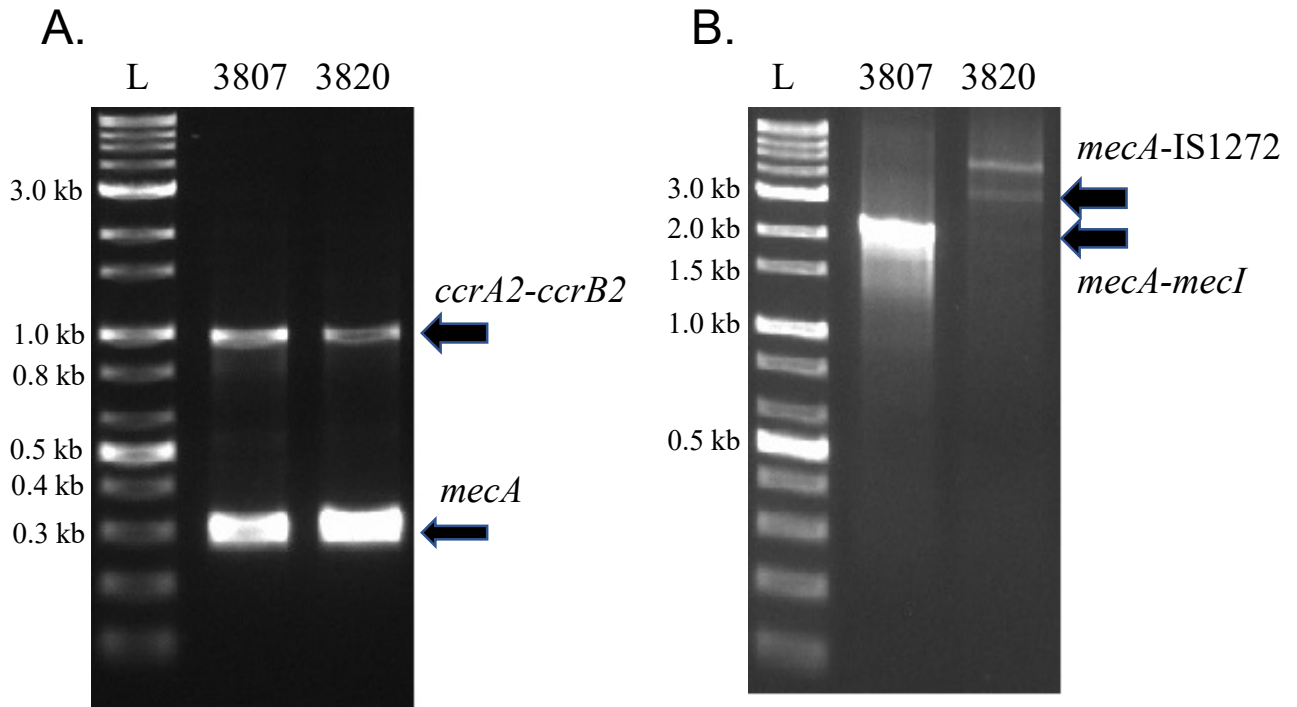

**Supplementary Figure S1.** SCC*mec* element type of MRSA CCARM 3807 and MRSA CCARM 3820. The presence of the SCC*mec* related genes were confirmed using PCR. The presence of *ccrA2-ccrB2* and *mecA* confirm the presence of the SCC*mec* element and are indicated by the arrows (A). Selective existence of *mecA-IS1272* or *mecA-mecI* was checked to identify the type of SCC*mec* element. L: DNA size marker (kilobase); 3807: MRSA CCARM 3807; 3820: MRSA CCARM 3820.
